# Supplementary material for: Effectiveness of Acute Malnutrition Treatment at Health Center and Community Level with a Simplified, Combined Protocol in Mali: An Observational Cohort Study
Source: Preprints.org preprint supplement (doi:10.20944/preprints202209.0102.v1), 2022-09-07
Supplement: Supplementary file 2 [file supplementary]

## Sheet: Sheet1
Table 5: Median LOS following simplified treatment by sub-groups
	Length of stay in days (n) by MUAC & edema category
Sub-groups	MUAC <125 mm or edema	MUAC <115 mm or edema	MUAC 115 to <125 mm
WHZ category
WHZ <-3	42 (9,622)	56 (5,238)	28 (4,384)
WHZ ≥ -3	28 (12,520)	49 (2,746)	28 (9,774)
Age group
≥24 months	28 (5,812)	49 (1,755)	28 (4,057)
<24 months	35 (21,774)	56 (7,822)	28 (13,952)
Weight category
≤7 kg	42 (17,634)	56 (8,016)	28 (9,618)
>7 kg	28 (9,952)	48 (1,561)	28 (8,391)
MUAC category
<110 mm	63 (3,470)	63 (3,470)
≥110 mm	35 (24,116)	49 (6,107)	28 (18,009)
WAZ category
<-3	42 (15,960)	56 (7,676)	28 (8,284)
≥-3	28 (11,598)	49 (1,873)	28 (9,725)
WaSt
WHZ <-3 & HAZ <-3	42 (7,952)	56 (4,738)	28 (3,214)
WHZ ≥-3 & HAZ <-3	35 (4,788)	49 (1,646)	28 (3,142)
WHZ <-3 & HAZ ≥-3	35 (1,659)	49 (498)	28 (1,161)
WHZ ≥-3 & HAZ ≥-3	28 (7,643)	49 (1,071)	28 (6,572)
Screened by
Health agent at health facility	35 (4,509)	49 (1,791)	28 (2,718)
Community health worker or volunteer	35 (10,468)	56 (3,772)	28 (6,696)
Caregiver (Family MUAC)	35 (11,418)	55 (3,624)	28 (7,794)
Cared at
Health facility	35 (22,091)	49 (8,041)	28 (14,050)
Community health worker site	35 (5,495)	56 (1,536)	28 (3,959)
